# Supplementary material for: Subgenome evolutionary dynamics in allotetraploid ferns: insights from the gene expression patterns in the allotetraploid species Phegopteris decursivepinnata (Thelypteridaceae, Polypodiales)
Source: Front Plant Sci. 2024 Jan 9;14:1286320. doi: 10.3389/fpls.2023.1286320 (PMC10803465; doi:10.3389/fpls.2023.1286320)
Supplement: Supplementary file 2 [file DataSheet_2.xlsx]

## Sheet: Supplementary Table 1
Supplementary Table 1. Voucher information for samples collected in this study.
Species	Voucher number	Location
Phegopteris koreana	OJ180806-1	Shiromaru, Okutama-machi, Tokyo Pref., Japan. (35°48'39.4"N 139°07'18.3"E)
Phegopteris koreana	OJ180806-4	Shiromaru, Okutama-machi, Tokyo Pref., Japan. (35°48'39.4"N 139°07'18.3"E)
Phegopteris taiwaniana	OJ180712-1	Iwamoto, Shibushi-shi, Kagoshima Pref (31°17'30.8"N 130°35'59.7"E)
Phegopteris taiwaniana	OJ180712-5	Kori, Ei-cho, Minamikyushu-shi, Kagoshima Pref. (31°13'54.6"N 130°30'10.2"E)
Phegopteris decursivepinnata	TY01	Miho-shiminno-mori, Miho-cho, Midori-ku, Yokohama-shi, Kanagawa Pref. (35°30'7.2"N 139°30'48.4"E)
Phegopteris decursivepinnata	TY02	Miho-shiminno-mori, Miho-cho, Midori-ku, Yokohama-shi, Kanagawa Pref. (35°30'7.2"N 139°30'48.4"E)
Phegopteris decursivepinnata	TY03	Miho-shiminno-mori, Miho-cho, Midori-ku, Yokohama-shi, Kanagawa Pref. (35°30'7.2"N 139°30'48.4"E)

## Sheet: Supplementary Table 2
Supplementary Table 2. Information for samples used for the sporophyte production of the parental species and artificial F1 hybrid production.
sample	P. koreana individual as parent	P. taiwaniana individual as parent	Maternal lineage
F1K1	OJ180806-1	OJ180712-1	P. koreana
F1K2	OJ180806-1	OJ180712-1	P. koreana
F1K3	OJ180806-1	OJ180712-1	P. koreana
F1T1	OJ180806-4	OJ180712-5	P. taiwaniana
F1T2	OJ180806-4	OJ180712-5	P. taiwaniana
T1	-	OJ180712-5	P. taiwaniana
T2	-	OJ180712-5	P. taiwaniana
T3	-	OJ180712-5	P. taiwaniana
K1	OJ180806-4	-	P. koreana
K2	OJ180806-4	-	P. koreana
K3	OJ180806-4	-	P. koreana

## Sheet: Supplementary Table 3
Supplementary Table 3. Summary for sequencing, assembly and filtering in this study.
Species	# of reads (PE150)	# of Transcripts	BUSCO score for the initial assembly	# of genes	# of nuclear genes with ORF	# of Orthogroups among 5 species	# of Orthogroups with up to 1 gene of each species	# of Orthogroups with 1 gene each in P. taiwaniana and P. koreana (reference sequences for mapping)	# of Orthogroups with 1 gene each in 5 species with TPM > 0.0	# of Orthogroups with 1 gene each in 5 species with TPM > 0.5	# of Orthogroups with 1 gene each in 5 species with TPM > 1.0
P. taiwaniana	T1_2021: 16,544,031 T1_2022: 22,335,139 T2: 17,846,482 T3: 15,167,725	136427	C:87.6%[S:36.4%,D:51.2%],F:3.6%,M:8.8%,n:1614	89720	26663	31936	24587	12380	12380	9540	9003
P. koreana	K1_2021: 16,530,438 K1_2022: 19,060,012 K2: 16,220,741 K3: 14,549,545	174475	C:87.9%[S:25.6%,D:62.3%],F:3.3%,M:8.8%,n:1614	106184	27814
F1K hybrid	F1K1: 16,932,042 F1K2: 16,336,346 F1K3: 16,033,171	138442	-	78220	27832
F1T hybrid	F1T1: 24,047,679 F1T2: 21,868,431	225188	-	127487	31796
P. decursivepinnata	D1: 22,234,491 D2: 16,266,071 D3: 18,728,169	195759	-	111307	29285

## Sheet: Supplementary Table 4
Supplementary Table 4. The list of strong K-biased genes (magnitude <-10) in P. decursivepinnata. Bold row indicates gene related to organelle.
OG	koreanaID	HEB magnitude in Pdec	TairID	GeneName	GO Cellular Component location	GO Biological Process involvement
N0.HOG0003982	koreana|TRINITY_DN128_c1_g1	-10.2465	AT5G01650	MDL2	chloroplast, cytoplasm, cytosol, nucleus
N0.HOG0011655	koreana|TRINITY_DN8238_c0_g1	-13.8369	AT4G29410	EL28Y	cytosolic large ribosomal subunit, plasma membrane, plasmodesma	translation
N0.HOG0012289	koreana|TRINITY_DN3008_c0_g1	-10.5063	AT4G04330	ATRBCX1	chloroplast thylakoid	ribulose bisphosphate carboxylase complex assembly
N0.HOG0013282	koreana|TRINITY_DN36_c6_g1	-10.7982	AT3G54850	ATPUB14	cytoplasm, nucleus	protein ubiquitination
N0.HOG0016108	koreana|TRINITY_DN1615_c0_g1	-12.1656	AT3G05060		nucleolus, nucleus
N0.HOG0017052	koreana|TRINITY_DN706_c0_g1	-11.6819	AT3G54420	ATCHITIV	extracellular region, plant-type cell wall	cell wall macromolecule catabolic process, response to bacterium, response to wounding
N0.HOG0017401	koreana|TRINITY_DN10613_c0_g1	-10.5614	AT2G31200	ACTIN DEPOLYMERIZING FACTOR 6	actin cytoskeleton, cytoplasm	actin filament depolymerization
N0.HOG0019937	koreana|TRINITY_DN3840_c0_g1	-10.2672	AT4G20150	NDU9/B14.5b	chloroplast, cytosol, mitochondrion, plant-type vacuole, mitochondrial respiratory chain complex I	biological_process
N0.HOG0020866	koreana|TRINITY_DN7656_c0_g1	-10.4111	AT5G52210	ATARLB1	Golgi apparatus	Golgi to plasma membrane protein transport, intracellular protein transport, protein localization to Golgi apparatus
N0.HOG0021440	koreana|TRINITY_DN5201_c1_g1	-10.0944	NA
N0.HOG0021674	koreana|TRINITY_DN53_c3_g1	-10.6957	NA
N0.HOG0021781	koreana|TRINITY_DN1495_c0_g2	-10.9544	AT4G31470		extracellular region	biological_process
N0.HOG0029222	koreana|TRINITY_DN1623_c0_g3	-10.4336	AT1G76100	PETE1	chloroplast, chloroplast thylakoid lumen, mitochondrion, thylakoid, thylakoid lumen

## Sheet: Supplementary Table 5
Supplementary Table 5. The list of strong T-biased genes (magnitude > 10) in P. decursivepinnata. Bold row indicates gene related to organelle.
OG	koreanaID	HEB magnitude in Pdec	TairID	GeneName	GO Cellular Component	GO Biological Process
N0.HOG0005498	koreana|TRINITY_DN1491_c0_g1	12.2808	AT2G45440	DHDPS2	chloroplast	lysine biosynthetic process via diaminopimelate
N0.HOG0007545	koreana|TRINITY_DN3257_c0_g1	11.4981	NA
N0.HOG0011133	koreana|TRINITY_DN493_c0_g1	12.3397	AT5G01740
N0.HOG0013722	koreana|TRINITY_DN10019_c0_g1	11.0402	AT2G30620	H1.2	nucleus	chromosome condensation, negative regulation of DNA recombination, nucleosome assembly
N0.HOG0015459	koreana|TRINITY_DN17049_c0_g1	10.0518	AT1G06220	CLO	cytoplasm, extracellular region, nuclear speck, plant-type cell wall	floral organ development, mRNA splicing, via spliceosome
N0.HOG0015707	koreana|TRINITY_DN6908_c1_g1	12.8695	AT5G58250	EMB3143	chloroplast, plastid, thylakoid	chlorophyll biosynthetic process
N0.HOG0017200	koreana|TRINITY_DN1270_c0_g1	10.5621	AT2G18390	ARF-LIKE 2	cytoplasm, microtubule cytoskeleton	protein folding
N0.HOG0017253	koreana|TRINITY_DN20571_c0_g1	11.226	AT1G15370	LOLITA	chloroplast	intra-Golgi vesicle-mediated transport, intracellular protein transport, retrograde vesicle-mediated transport, Golgi to endoplasmic reticulum
N0.HOG0020559	koreana|TRINITY_DN5361_c0_g1	11.9419	AT3G02780	IDI2	chloroplast, cytosol, mitochondrion	chlorophyll biosynthetic process, dimethylallyl diphosphate biosynthetic process, isopentenyl diphosphate biosynthetic process
N0.HOG0022739	koreana|TRINITY_DN1906_c0_g1	11.3823	AT1G64160	ATDIR5	extracellular region	(-)-pinoresinol biosynthetic process
N0.HOG0024707	koreana|TRINITY_DN672_c1_g2	11.4919	NA

## Sheet: Supplementary Table 6
Supplementary Table 6. The list of strong K-biased genes (magnitude <-10) in F1K. Bold row indicates gene related to organelle.
OG	koreanaID	HEB magnitude in Pdec	TairID	GeneName	GO Cellular Component	GO Biological Process
N0.HOG0011655	koreana|TRINITY_DN8238_c0_g1	-13.8369	AT4G29410	EL28Y	cytosolic large ribosomal subunit, plasma membrane, plasmodesma
N0.HOG0017437	koreana|TRINITY_DN12421_c0_g1	-7.61219	AT5G03610	GGL25	extracellular region	embryo development ending in seed dormancy, phyllome development, plant organ morphogenesis, post-embryonic plant morphogenesis, response to abscisic acid, response to ethylene, response to osmotic stress, root development, tissue development, xylem and phloem pattern formation
N0.HOG0020866	koreana|TRINITY_DN7656_c0_g1	-10.4111	AT5G52210	ATARLB1	Golgi apparatus
N0.HOG0021674	koreana|TRINITY_DN53_c3_g1	-10.6957	NA
N0.HOG0029222	koreana|TRINITY_DN1623_c0_g3	-10.4336	AT1G76100	PLASTOCYANIN 1	chloroplast, chloroplast thylakoid lumen, mitochondrion, thylakoid, thylakoid lumen

## Sheet: Supplementary Table 7
Supplementary Table 7. The list of strong T-biased genes (magnitude > 10) in F1K. Bold row indicates gene related to organelle.
OG	koreanaID	HEB magnitude in Pdec	TairID	GeneName	GO Cellular Component	GO Biological Process
N0.HOG0004066	koreana|TRINITY_DN15414_c0_g1	11.1063	AT3G60290		cytoplasm	biological_process
N0.HOG0013653	koreana|TRINITY_DN5097_c0_g1	11.8775	AT3G47800		cytoplasm	galactose catabolic process via UDP-galactose, glucose metabolic process, hexose metabolic process
N0.HOG0013722	koreana|TRINITY_DN10019_c0_g1	11.0006	AT2G30620	H1.2	nucleus	chromosome condensation, negative regulation of DNA recombination, nucleosome assembly
N0.HOG0014724	koreana|TRINITY_DN1874_c2_g1	10.5365	AT5G35080	ATOS9	endoplasmic reticulum lumen	endoplasmic reticulum unfolded protein response, retrograde protein transport, ER to cytosol, ubiquitin-dependent ERAD pathway
N0.HOG0015707	koreana|TRINITY_DN6908_c1_g1	14.034	AT5G58250	EMB3143	chloroplast, plastid, thylakoid	chlorophyll biosynthetic process
N0.HOG0017200	koreana|TRINITY_DN1270_c0_g1	10.6432	AT2G18390	ARF-LIKE 2	cytoplasm, microtubule cytoskeleton	protein folding
N0.HOG0017253	koreana|TRINITY_DN20571_c0_g1	11.9503	AT1G15370	LOLITA	chloroplast	intra-Golgi vesicle-mediated transport, intracellular protein transport, retrograde vesicle-mediated transport, Golgi to endoplasmic reticulum
N0.HOG0017893	koreana|TRINITY_DN2984_c2_g1	10.5204	AT5G60990	RNA HELICASE10	nucleus	biological_process
N0.HOG0020904	koreana|TRINITY_DN112_c0_g1	11.6743	AT5G66110	ATHMP55	cytoplasm, plasma membrane	response to nematode
